# Supplementary material for: Pre-clinical dose-ranging efficacy, pharmacokinetics, tissue biodistribution, and toxicity of a targeted contrast agent for MRI of amyloid deposition in Alzheimer’s disease
Source: PubMed Central journal article supplement (PMC7527957; doi:10.1038/s41598-020-73233-7), 2020-09-30
Supplement: 41598_2020_73233_MOESM1_ESM.pdf [file 41598_2020_73233_MOESM1_ESM.pdf]

## Supplementary Information

### **Pre-clinical dose-ranging efficacy, pharmacokinetics, tissue biodistribution, and toxicity of a targeted contrast agent for MRI of amyloid deposition in Alzheimer's disease**

#### **Authors and affiliations:**

**Andrew A. Badachhape, Ph.D.**, Department of Radiology, Baylor College of Medicine, Houston, TX 77030, USA, badachha@bcm.edu

Peter K. Working, Ph.D., Alzeca Biosciences Inc., Houston, TX 77057, USA, peterworking@workingadvisors.com

Mayank Srivastava, Ph.D., The Singleton Department of Pediatric Radiology, Texas Children's Hospital, Houston, TX 77030, USA, mxsrivas@texaschildrens.org

Prajwal Bhandari, M.S., Department of Radiology, Baylor College of Medicine, Houston, TX 77030, USA, prajwal.bhandari@bcm.edu

Igor V. Stupin, Ph.D., The Singleton Department of Pediatric Radiology, Texas Children's Hospital, Houston, TX 77030, USA, ivstupin@texaschildrens.org

Laxman Devkota, Ph.D., Department of Pediatrics-Oncology, Baylor College of Medicine, Houston, TX 77030, USA, laxman.devkota@bcm.edu

Eric A. Tanifum, Ph.D., The Singleton Department of Pediatric Radiology, Texas Children's Hospital, Houston, TX 77030, USA, eatanifu@texaschildrens.org

Ananth V. Annapragada, Ph.D., The Singleton Department of Pediatric Radiology, Texas Children's Hospital, Houston, TX 77030, USA, avannapr@texaschildrens.org

\*Ketan B. Ghaghada, Ph.D., The Singleton Department of Pediatric Radiology, Texas Children's Hospital, Houston, TX 77030, USA, kbghagha@texaschildrens.org

#### **\*Corresponding author:**

Ketan B. Ghaghada, Ph.D.

Edward B. Singleton Department of Radiology, Texas Children's Hospital

Department of Radiology, Baylor College of Medicine

1102 Bates Street, Suite 850

Houston, TX 77030

Phone: 832-824-0861

Email: kbghagha@texaschildrens.org

## 1 Supplementary Information

2

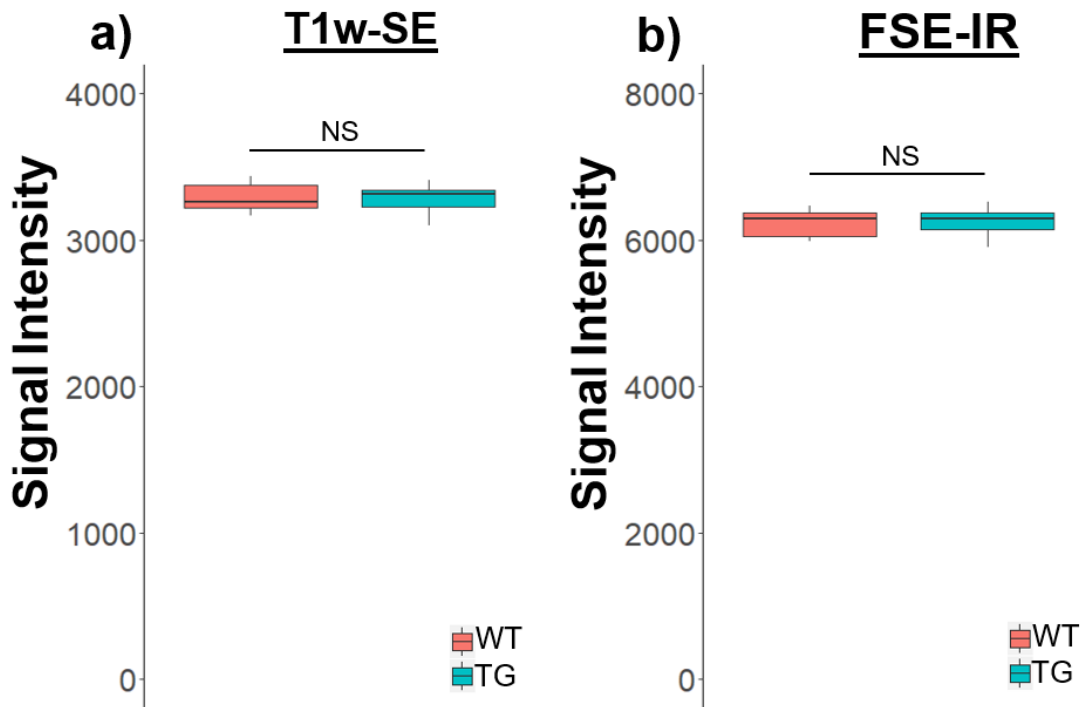

3

4 **Supplementary Figure S1:** No significant differences in signal intensity were seen in pre-contrast  
5 magnetic resonance imaging (MRI) scans of transgenic and wild type mice. Signal intensity mean  
6 and range for (a) T1-weighted spin echo (T1w-SE), and (b) fast spin echo inversion recovery  
7 (FSE-IR) sequences for pre-contrast scans of both wild type (n=18) and transgenic (n=18)  
8 animals. Regions of interest (ROI) were drawn in the cortex for each animal. No significant  
9 differences (NS) were found between signal intensities for wild type and transgenic animals for  
10 either T1w-SE or FSE-IR sequences.

11

12

13

14

15

16

17

18

19

1

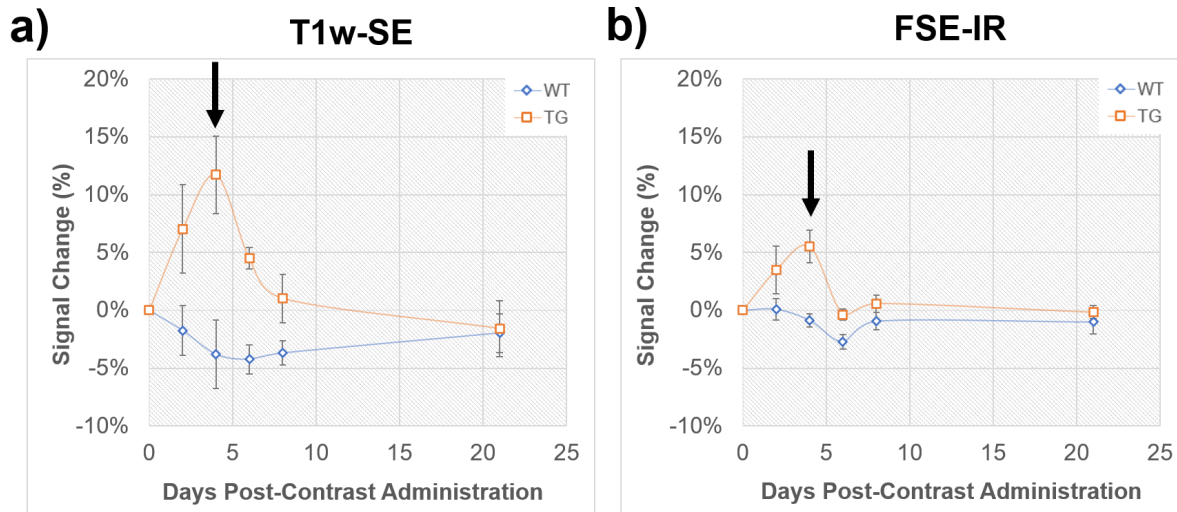

2

3 **Supplementary Figure S2:** Determination of optimal time point for imaging of amyloid plaques.  
 4 Three transgenic and three wild type mice were imaged before (Day 0) and after administration  
 5 of ADx-001 at 2, 4, 6, 8, and 21 days post-contrast. Maximum signal enhancement was seen at  
 6 day 4 post-contrast (black arrow). Transgenic animals demonstrated signal enhancement relative  
 7 to wild type animals in both **(a)** T1-weighted spin echo (T1w-SE) and **(b)** fast spin echo inversion  
 8 recovery (FSE-IR) sequences. Signal returned to near baseline levels by day 21.

9

10

11

12

13

14

15

16

17

18

19

20

21

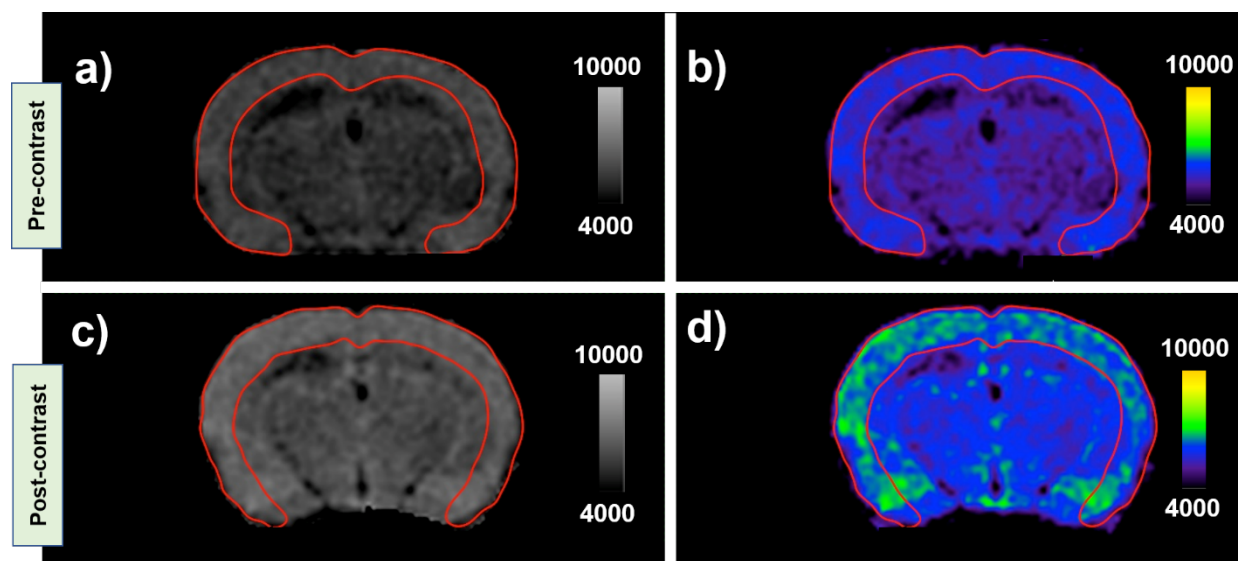

1  
2 **Supplementary Figure S3:** Demonstration of cortical regions of interest (ROI) identification.  
3 Cortical ROIs are outlined in red on fast spin echo inversion recovery (FSE-IR) brain images. Pre-  
4 contrast gray scale (a) and post-contrast gray scale (c) images are compared with pre-contrast  
5 (b) and post-contrast (d) color magnitude images.

6
